# Supplementary material for: A novel bispecific c-MET/PD-1 antibody with therapeutic potential in solid cancer
Source: PubMed Central journal article supplement (PMC5438713; doi:10.18632/oncotarget.16173), 2017-03-14
Supplement: oncotarget-08-29067-s001.pdf [file oncotarget-08-29067-s001.pdf]

## A novel bispecific c-MET/PD-1 antibody with therapeutic potential in solid cancer

### SUPPLEMENTARY MATERIALS

#### SUPPLEMENTARY FIGURE

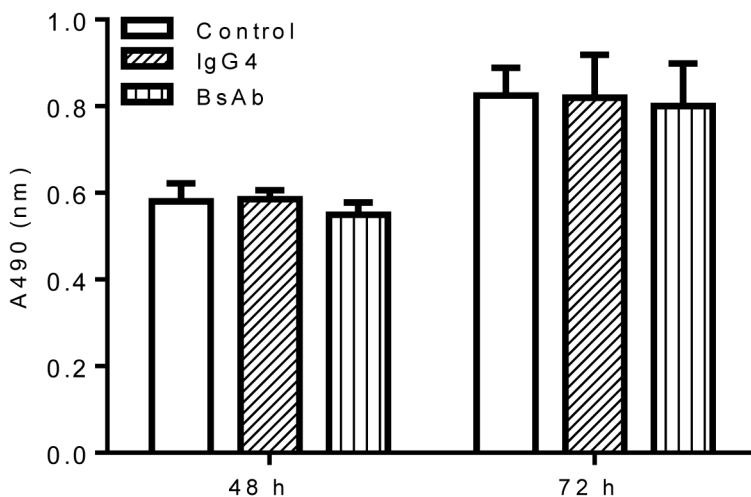

**Supplementary Figure 1: Safety evaluation of BsAb on HUVEC cells.** HUVEC cells were seeded in a 96-well plate at  $1 \times 10^4$  each hole overnight and were grown in the presence of PBS (control), IgG4 (0.5  $\mu$ M) or BsAb (0.5  $\mu$ M). The viability of HUVEC cells were assessed by MTS assay after treatment with BsAb for 48 h and 72 h. MTS (20  $\mu$ l) was added to each sample and incubated for 4 h. The absorbance of solution was recorded at 490 nm with a thermo microplate reader. The results of the MTS assay to reflect cell viability. Each experiment was repeated 3 times and the results were shown mean  $\pm$  SD.
